# Supplementary material for: Disturbed sleep after lung transplantation is associated with worse patient-reported outcomes and chronic lung allograft dysfunction
Source: bioRxiv or medRxiv preprint supplement (doi:10.1101/2023.10.12.23296973), 2024-01-23
Supplement: Supplementary file [file media-1.pdf]

## **Supplemental Material**

### **Disturbed sleep after lung transplantation is associated with worse patient-reported outcomes and chronic lung allograft dysfunction**

Aric A. Prather, PhD, Ying Gao MS, Legna Betancourt BS, Rose C Kordahl BS, Anya Sriram BS, Chiung-Yu Huang PhD, Steven R Hays MD, Jasleen Kukreja MD, Daniel R. Calabrese MD, Aida Venado MD, Bhavya Kapse PhD, John R Greenland MD PhD, Jonathan P Singer, MD MS

**Appendix Table 1.**

|                                  | <b>Continuous scale</b><br>SPI MID = 8 Insomnia MID = 12 |                | <b>Worst Quartile</b>      |                |
|----------------------------------|----------------------------------------------------------|----------------|----------------------------|----------------|
|                                  | <b>Sleep Problem Index (SPI)</b>                         |                |                            |                |
| <b>Predictor</b>                 | <b>Parameter estimate (95% CI)</b>                       | <b>p-value</b> | <b>Odds ratio (95% CI)</b> | <b>p-value</b> |
| Severe PGD                       | 3.80 (-2.66, 10.27)                                      | 0.25           | 0.97 (0.39, 2.45)          | 0.95           |
| Length of hospital stay >30 days | 12.18 (3.38, 20.99)                                      | 0.01           | 7.09 (2.10, 23.95)         | <0.01          |
| Delirium                         | -1.14 (-10.59, 8.30)                                     | 0.81           | 2.40 (0.69, 8.38)          | 0.17           |
|                                  | <b>Insomnia</b>                                          |                |                            |                |
| Severe PGD                       | 1.51 (-7.63, 10.64)                                      | 0.74           | 0.72 (0.27, 1.92)          | 0.51           |
| Length of hospital stay >30 days | 14.56 (2.08, 27.04)                                      | 0.02           | 1.69 (0.47, 6.04)          | 0.42           |
| Delirium                         | -0.27 (-13.28, 12.74)                                    | 0.97           | 0.67 (0.13, 3.40)          | 0.63           |

**Appendix Table 2.**

|                                             |                          | <b>Time from survey to CLAD (Hazards Ratio)</b> | <b>Time from survey to Death (Hazards Ratio)</b> |
|---------------------------------------------|--------------------------|-------------------------------------------------|--------------------------------------------------|
| <b>Sleep Problem Index (SPI)</b><br>MID = 8 | <b>Per MID worsening</b> | 1.09 (0.93, 1.27)<br>p = 0.29                   | 1.27 (1.02, 1.57)<br>p = 0.03                    |
|                                             | <b>Worst quartile</b>    | 1.76 (0.90, 3.45)<br>p = 0.10                   | 2.06 (0.82, 5.18)<br>p = 0.12                    |
| <b>Insomnia</b><br>MID = 12                 | <b>Per MID worsening</b> | 1.15 (0.98, 1.36)<br>p = 0.09                   | 1.10 (0.88, 1.38)<br>p = 0.41                    |
|                                             | <b>Worst quartile</b>    | 1.73 (0.87, 3.47)<br>p = 0.12                   | 0.64 (0.21, 1.96)<br>p = 0.43                    |
